# Supplementary material for: Etiology of Acute Coronary Syndrome in a Young Woman: Can Intracoronary Imaging Help?
Source: PubMed Central journal article supplement — CJC Open. 2023 Mar 24;5(5):345–7. doi: 10.1016/j.cjco.2023.03.011 (PMC10290962; doi:10.1016/j.cjco.2023.03.011), 2023-03-24

**Supplemental Table S1. Initial laboratory investigations**

| <b>Test</b>                                 | <b>Result</b> |
|---------------------------------------------|---------------|
| Pre-hospital lipid profile, mmol/L*         |               |
| Total cholesterol                           | 4.34          |
| HDL-cholesterol                             | 1.37          |
| LDL-cholesterol                             | 2.38          |
| Triglycerides                               | 1.30          |
| Non-HDL cholesterol                         | 2.97          |
| Complete Blood Count                        |               |
| White blood cell count, X10 <sup>9</sup> /L | 8.3           |
| Platelet count, X10 <sup>9</sup> /L         | 241           |
| Hemoglobin, g/L                             | 140           |
| Hematocrit, L/L                             | 0.41          |
| Creatinine, umol/L                          | 59            |
| Hemoglobin A <sub>1c</sub> , %              | 4.8           |
| Thyroid stimulating hormone, mIU/L          | 1.3           |

|                                      |                                                                          |
|--------------------------------------|--------------------------------------------------------------------------|
| D-dimer, mcg/L                       | 343                                                                      |
| β HCG, IU/L                          | <2                                                                       |
| C-reactive protein, mg/L             | 2.4                                                                      |
| Erythrocyte sedimentation rate, mm/h | 8                                                                        |
| COVID-19 virus PCR test              | Not detected                                                             |
| Troponin I**, mcg/L                  | <0.012 (initial)<br>0.53 (6 hours)<br>1.10 (12 hours)<br>1.65 (18 hours) |

\*performed 4 weeks before hospitalization

\*\*Troponin I >0.12 mcg/L is consistent with myocardial infarction.

Abbreviations: HDL high density lipoprotein, LDL low-density lipoprotein, HCG human choriogonadotropin

## Supplemental Table S2. Diagnostic dilemma

| Favoring SCAD                          | Favoring Atherosclerosis                                                 |
|----------------------------------------|--------------------------------------------------------------------------|
| Female sex                             | Family history of premature CAD                                          |
| Young age                              | Symptoms started several weeks before hospitalization (not sudden onset) |
| Paucity of cardiovascular risk factors | No extra-cardiac FMD                                                     |
| Smooth coronary arteries               | No angiographic improvement 2 weeks after hospitalization                |
| Mild coronary tortuosity               |                                                                          |

Abbreviations: SCAD spontaneous coronary artery dissection, CAD coronary artery disease,

FMD fibromuscular dysplasia

## Supplemental figure 1: ECG on admission

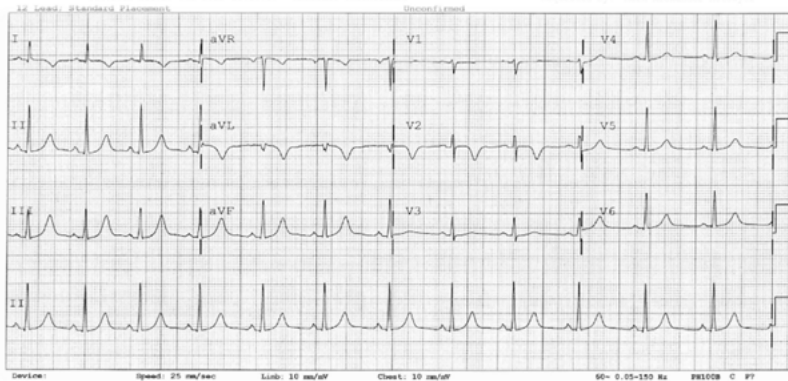

Supplemental figure 2: Post interventional OCT

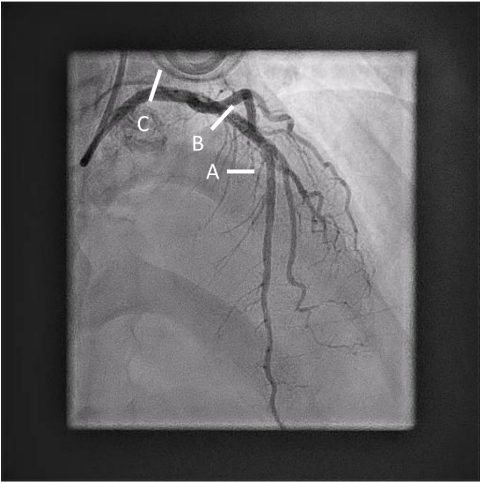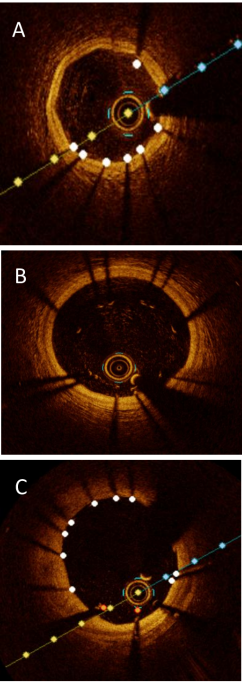

Supplement: mmc1.pdf [file mmc1.pdf]
